# Supplementary material for: Cytokit: a single-cell analysis toolkit for high dimensional fluorescent microscopy imaging
Source: PubMed Central journal article supplement (PMC6720861; doi:10.1186/s12859-019-3055-3), 2019-09-02

## Before Quality Control Gating

## After Quality Control Gating

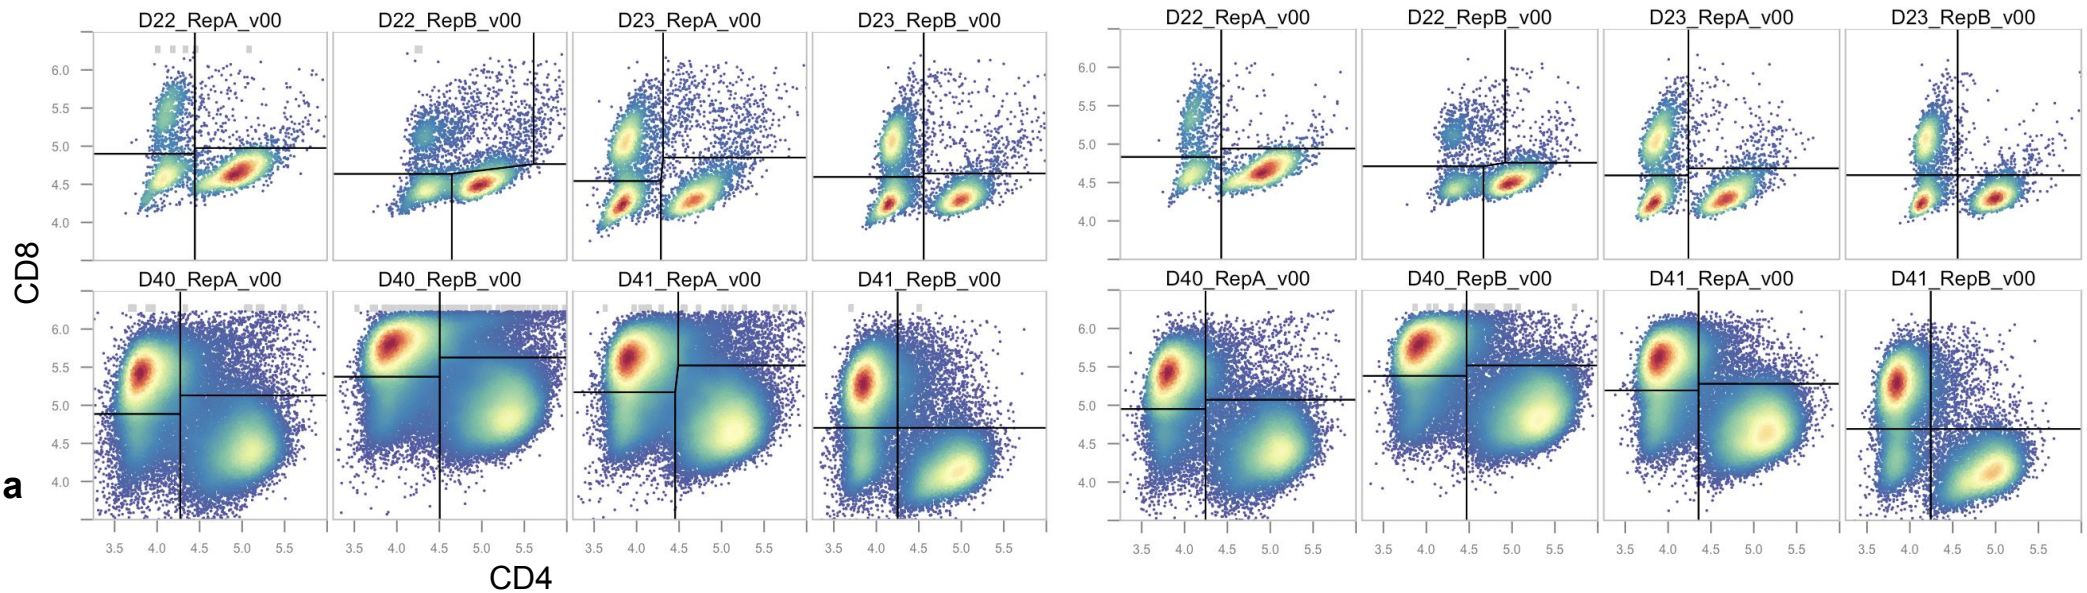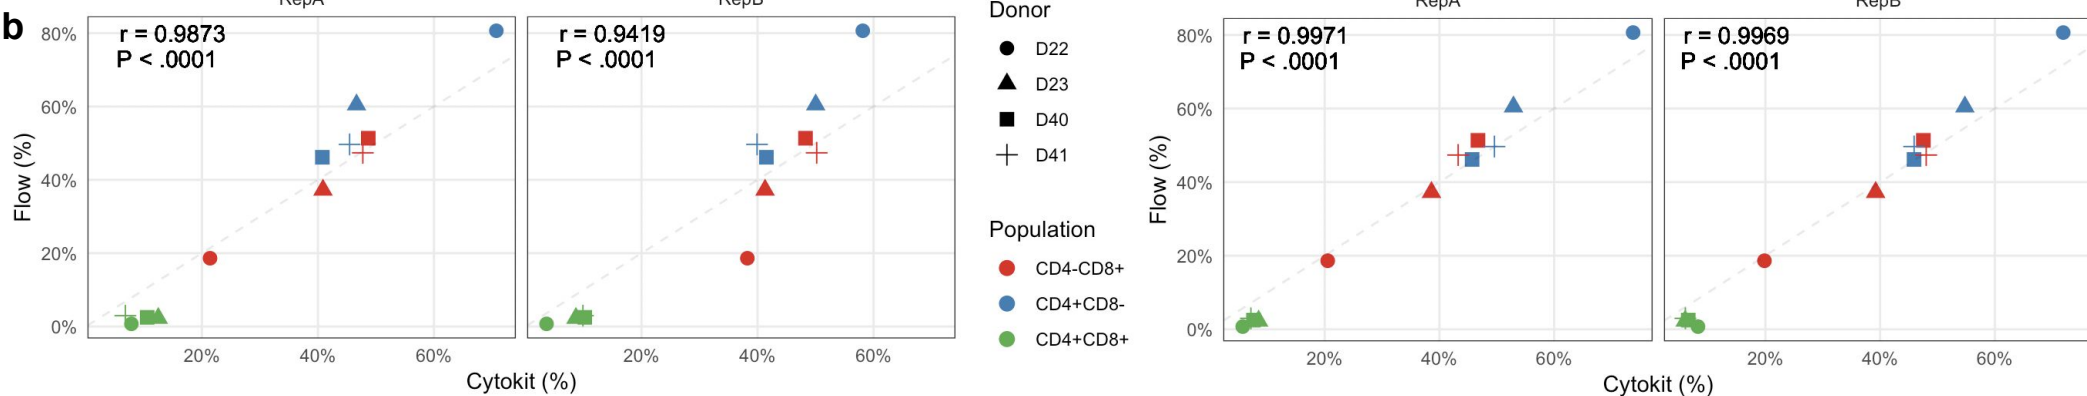

Supplement: 12859_2019_3055_MOESM1_ESM.pdf [file 12859_2019_3055_MOESM1_ESM.pdf]
